# Supplementary material for: Reducing ability of supramolecular C60dianion toward CO, CC and N–N bonds
Source: Royal Society of Chemistry journal article supplement (doi:10.1039/b414977g), 2005-01-01
Supplement: b414977g.pdf [file b414977g.pdf]

## Supporting Information

Title: Reducing ability of supramolecular C<sub>60</sub> dianion toward C=O, C=C and N–N bonds

Authors: Shin-ichi Takekuma, Hideko Takekuma, and Zen-ichi Yoshida\*

Department of Applied Chemistry,  
Faculty of Science and Engineering,  
Kinki University,  
3-4-1, Kowakae, Higashi-Osaka 577-8502, Japan  
Fax: (+81) 6-6727-4301  
E-mail: yoshida@chem.kindai.ac.jp

1. MOZYME (AM1) analysis on structure of  $\gamma$ -cyclodextrin-bicapped C<sub>60</sub>·16H<sub>2</sub>O.
2. FAB-MS data of  $\gamma$ -cyclodextrin-bicapped C<sub>60</sub> (**1**).
3. Experimental data on efficiency of **2** in ketone reduction: Ketone was reacted with **2** (generated from **1** and NaBH<sub>4</sub>) in DMSO - H<sub>2</sub>O (9:1, v/v) at 25 °C for 1 h. The reaction mixture was diluted with water and extracted with diethyl ether (twice). The ether layer was washed with water and dried over MgSO<sub>4</sub>. The control experiment was made by using NaBH<sub>4</sub> instead of **2** under the same condition. The product (GC-MS) and yield (GLC) are shown in the Table.

## Heat of Formation, Heat of Complexation, and HOMO LUMO Obtained by MOZYME (AM1) Calculation

KEYWORD : BFGS PRECISE GEO-OK AM1 ALLBONDS SCFCRT=10<sup>-10</sup> PL  
EIGEN VECTORS ALLVEC T=11D

|                                               | Heat of Formation (kcal/mol) | Gradient Norm  | HOMO (eV)      | LUMO (eV)      | HOMO-LUMO gap (eV) | next LUMO (eV) |
|-----------------------------------------------|------------------------------|----------------|----------------|----------------|--------------------|----------------|
| H <sub>2</sub> O                              | <b>-59.247</b>               | <b>1.317</b>   |                |                |                    |                |
| $\gamma$ -CyD                                 | <b>-1667.737</b>             | <b>7.880</b>   |                |                |                    |                |
| C <sub>60</sub>                               | <b>973.004</b>               | <b>63.002</b>  | <b>-9.6204</b> | <b>-2.9681</b> | <b>6.6523</b>      |                |
| C <sub>60</sub> / $\gamma$ -CyD               | <b>-893.955</b>              | <b>863.693</b> | <b>-9.6827</b> | <b>-3.0213</b> | <b>6.6614</b>      | <b>-2.3312</b> |
| Bicapped C <sub>60</sub>                      | <b>-2768.469</b>             | <b>255.948</b> | <b>-9.5630</b> | <b>-3.0334</b> | <b>6.5296</b>      | <b>-2.3128</b> |
| Bicapped C <sub>60</sub> · 16H <sub>2</sub> O | <b>-3760.248</b>             | <b>421.820</b> | <b>-8.8907</b> | <b>-2.2829</b> | <b>6.6078</b>      | <b>-1.5801</b> |

| Complex                                       | $\Delta H_f$ (kcal/mol) | $\Sigma \Delta H_f$ (kcal/mol) | $-\Delta H_{\text{complex}}$ (kcal/mol) |                      |
|-----------------------------------------------|-------------------------|--------------------------------|-----------------------------------------|----------------------|
| C <sub>60</sub> / $\gamma$ -CyD               | <b>-893.955</b>         | <b>-694.73</b>                 | <b>199.22</b>                           | <b>Stabilization</b> |
| Bicapped C <sub>60</sub>                      | <b>-2768.469</b>        | <b>-2362.47</b>                | <b>406.00</b>                           | <b>Stabilization</b> |
| Bicapped C <sub>60</sub> · 16H <sub>2</sub> O | <b>-3760.248</b>        | <b>-3310.42</b>                | <b>449.83</b>                           | <b>Stabilization</b> |

MOZYME analysis on structure of  $\gamma$ -cyclodextrin-bicapped  $C_{60} \cdot 16H_2O$

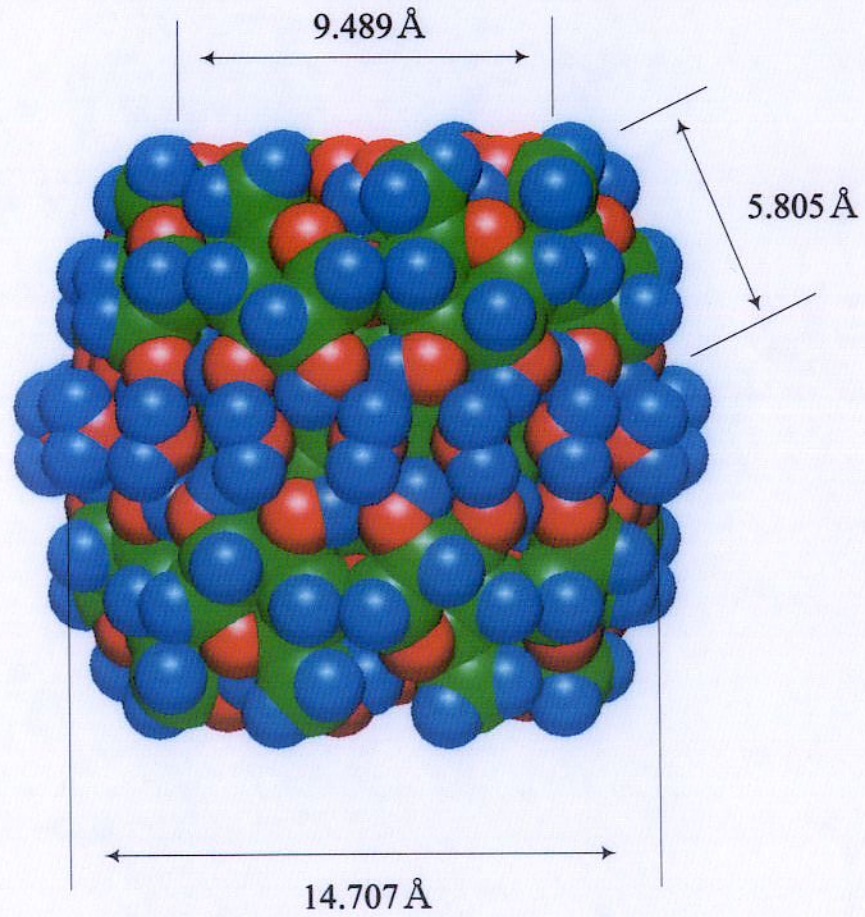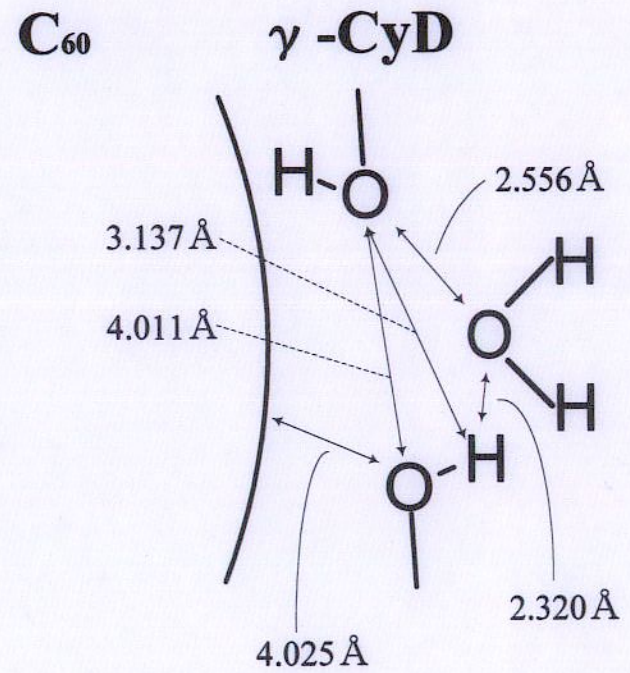

**[ Space Filling ]**

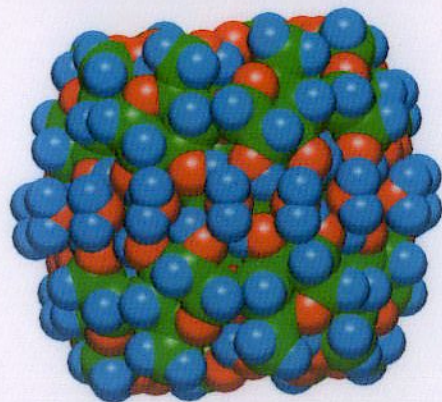

**[ HOMO ]**

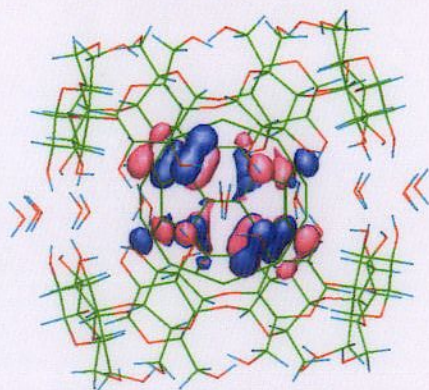

**[ LUMO ]**

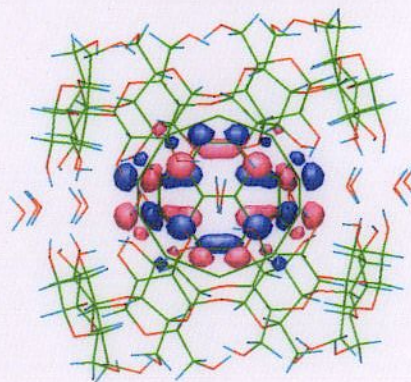

**[ next LUMO ]**

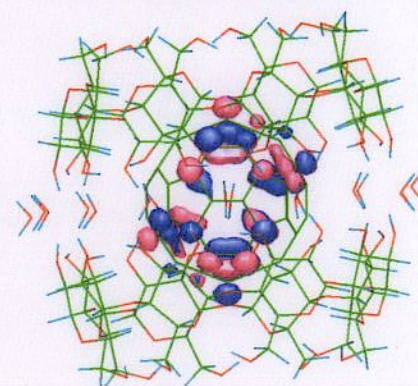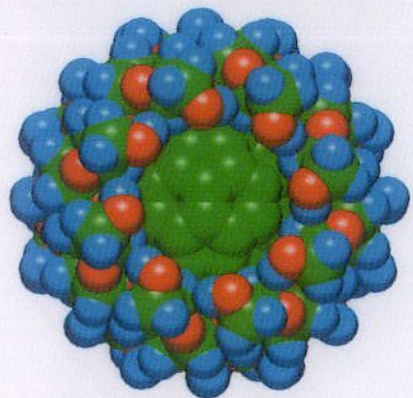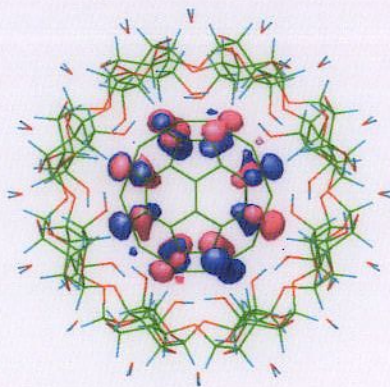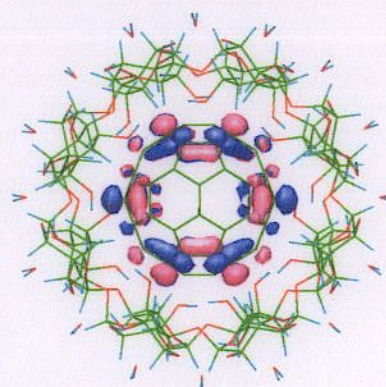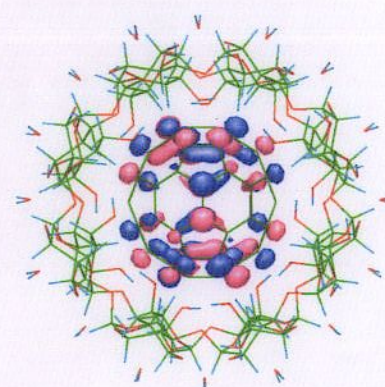

**-8.8907 eV**

**-2.2829 eV**

**-1.5801 eV**

FAB-MS ( matrix : dithiothreitol / dithioerythritol = 3 / 1 , v / v ) datum of  $\gamma$ -cyclodextrin-bicapped C<sub>60</sub> (1)

[ Mass Spectrum ]  
Data : POS-FAB080 Date : 05-Dec-2003 10:52  
Sample: T-15  
Note : -  
Inlet : Direct Ion Mode : FAB+  
Spectrum Type : Normal Ion [EF-Linear]  
RT : 4.25 min Scan# : (18,35)  
BP : m/z 3314.8433 Int. : 0.35  
Output m/z range : 3295.1040 to 3358.9021 Cut Level : 0.00 %

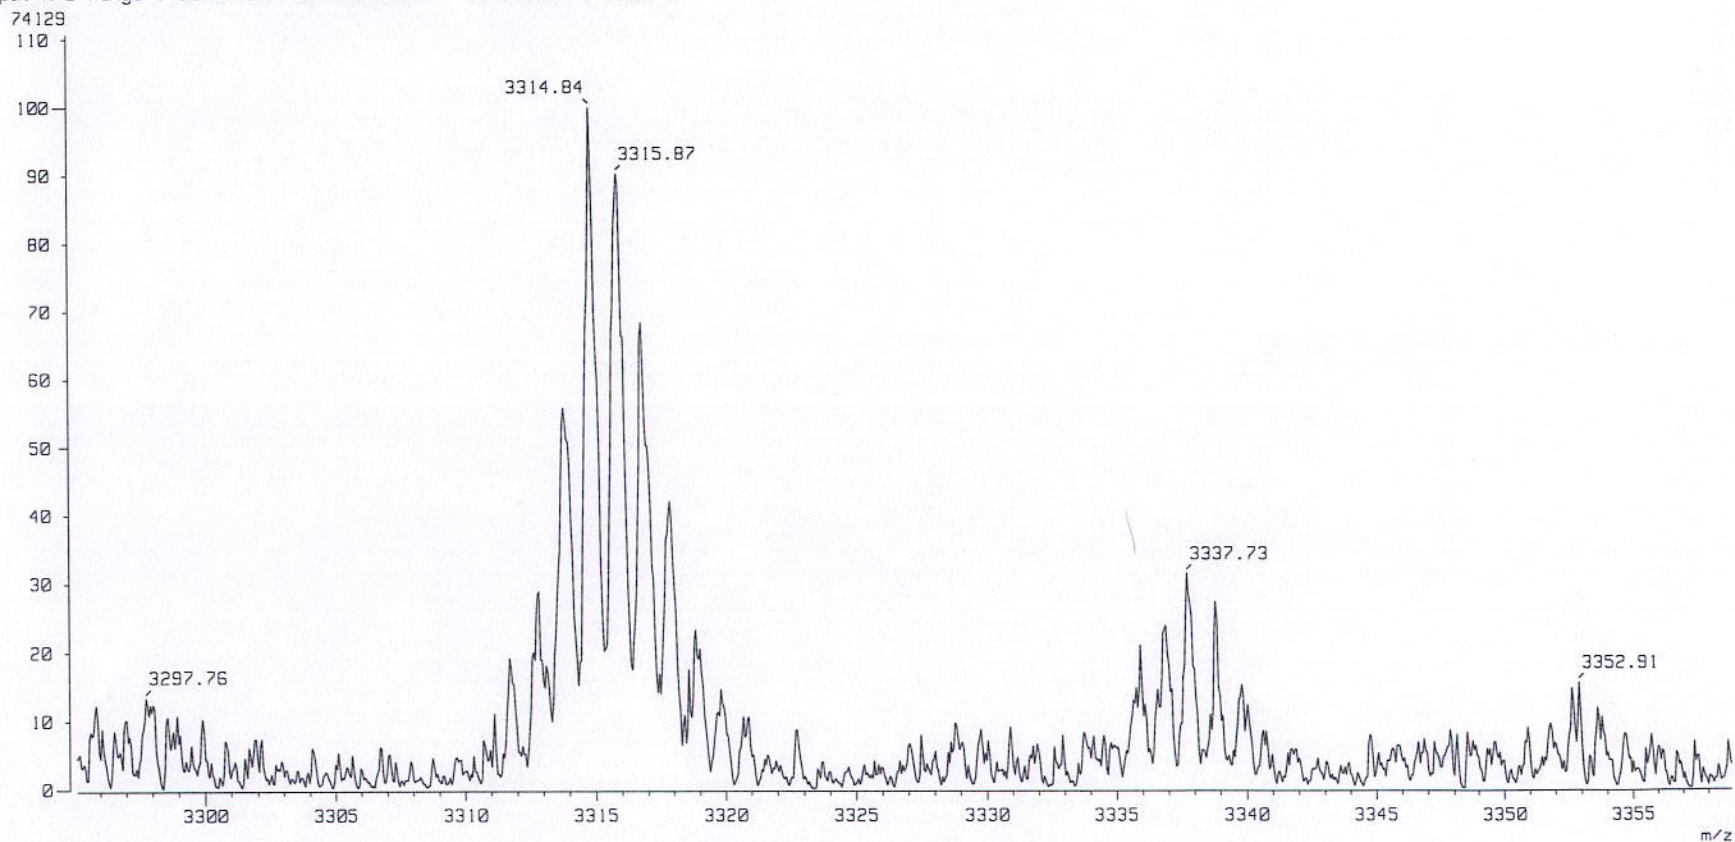

[ Theoretical Ion Distribution ]

Molecular Formula : C156 H161 O80

(m/z 3313.8530, MW 3315.9463, U.S. 76.5)

Base Peak : 3314.8564, Averaged MW : 3315.9503 (a), 3315.9510 (w)

| m/z       | INT.     |       |
|-----------|----------|-------|
| 3313.8530 | 55.8749  | ***** |
| 3314.8564 | 100.0000 | ***** |
| 3315.8596 | 97.9074  | ***** |
| 3316.8626 | 68.4576  | ***** |
| 3317.8656 | 38.0002  | ***** |
| 3318.8685 | 17.7169  | ***** |
| 3319.8713 | 7.1837   | ****  |
| 3320.8741 | 2.5935   | **    |
| 3321.8768 | 0.8479   |       |
| 3322.8795 | 0.2542   |       |
| 3323.8822 | 0.0706   |       |
| 3324.8849 | 0.0183   |       |
| 3325.8876 | 0.0045   |       |
| 3326.8902 | 0.0010   |       |
| 3327.8928 | 0.0002   |       |

[ Elemental Composition ]

Data : POS-FAB081

Date : 05-Dec-2003 11:42

Sample: T-15

Note : -

Inlet : Direct

Ion Mode : FAB+

RT : 1.34 min

Scan#: (2,16)+(43,65)+(92,105)

Elements : C 160/100, H 200/100, O 85/75

Mass Tolerance : 30mmu

Unsaturation (U.S.) : -0.5 - 100.0

| Observed m/z | Int% | Err [ppm / mmu] | U.S. | Composition      |
|--------------|------|-----------------|------|------------------|
| 3313.8718    | 65.9 | +1.1 / +3.6     | 80.5 | C 160 H 161 O 77 |
|              |      | -5.3 / -17.6    | 75.5 | C 157 H 165 O 79 |
|              |      | +5.7 / +18.8    | 76.5 | C 156 H 161 O 80 |
|              |      | -0.7 / -2.3     | 71.5 | C 153 H 165 O 82 |
|              |      | -7.1 / -23.4    | 66.5 | C 150 H 169 O 84 |
|              |      | +3.9 / +13.0    | 67.5 | C 149 H 165 O 85 |

**Table.** Ketone reduction of  $\gamma$ -cyclodextrin-bicapped C<sub>60</sub> dianion (**2**) or NaBH<sub>4</sub><sup>a</sup>

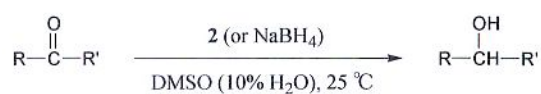

| Entry | Substrate | Product <sup>b</sup> | Yield <sup>c</sup> (%)         |
|-------|-----------|----------------------|--------------------------------|
| 1     |           |                      | 100 (8)<br>(32.3) <sup>d</sup> |
| 2     |           |                      | 100 (6)<br>(28.4) <sup>d</sup> |
| 3     |           |                      | 100 (8)<br>(52.1) <sup>d</sup> |
| 4     |           |                      | 100 (8)<br>(42.5) <sup>d</sup> |
| 5     |           |                      | 100 (3)<br>(33.8) <sup>d</sup> |

a. Condition of parallel experiment: substrate (8-21  $\mu$  mol), reducing agent (1) **2** generated from **1**  $\cdot$  24H<sub>2</sub>O (2.7  $\mu$  mol) and NaBH<sub>4</sub> (131.5  $\mu$  mol), and (2) NaBH<sub>4</sub> (131.5  $\mu$  mol) in the absence of **1** at 25  $^\circ$ C, for 1 h.

b. Product is only the corresponding carbinol. No pinacole formation is observed.

c. Determined by GLC analysis: the value in parenthesis shows TOF (h<sup>-1</sup>).

d. Control experiment with NaBH<sub>4</sub>.
